# Supplementary material for: Cranberry phytochemicals inhibit glycation of human hemoglobin and serum albumin by scavenging reactive carbonyls
Source: Royal Society of Chemistry journal article supplement (doi:10.1039/c1fo10087d), 2011-01-01
Supplement: c1fo10087d.pdf [file c1fo10087d.pdf]

## Cranberry Phytochemicals Inhibit Glycation of Human Hemoglobin and Serum Albumin by Scavenging Reactive Carbonyls

Haiyan Liu<sup>1</sup>, Hanwei Liu<sup>1</sup>, Wei Wang<sup>1</sup>, Christina Khoo<sup>2</sup>, James Taylor<sup>3</sup>, Liwei Gu<sup>1\*</sup>

<sup>1</sup> Department of Food Science and Human Nutrition, Institute of Food and Agricultural Sciences, University of Florida, Gainesville, Florida 32611. <sup>2</sup> Ocean Spray Cranberries, Inc. One Ocean Spray Drive, Lakeville-Middleboro, MA 02347. <sup>3</sup> College of Pharmacy, University of Florida, Gainesville, Florida 32611.

### Supplemental data:

**HPLC-MS analysis of cranberry phytochemical extract and fractions:** Five milligrams of each cranberry fraction was dissolved in 1 mL methanol. All the test solutions were centrifuged at 13 300 rpm for 5 minutes before injection. Twenty  $\mu\text{L}$  of cranberry phytochemical extract, water fraction, water fraction-I, II, and III, 10  $\mu\text{L}$  of ethyl acetate fraction were injected for HPLC analysis (Agilent Technologies, Palo Alto, CA). Compound separation was carried on a Luna Silica column (250  $\times$  4.6 mm, 5 $\mu\text{m}$ , Phenomenex, Torrance, CA). Mobile phases were composed of (A) methylene chloride/methanol/acetic acid/water (82:14:2:2, v/v/v/v) and (B) methanol/acetic acid/ water (96:2:2, v/v/v). The flow rate was set as 1 mL/min. The gradient for elution was: 0–20 min, 0.0–11.7% B linear; 20–50 min, 11.7–25.6% B linear; 50–55 min, 25.6–87.8% B linear; 55–65 min, 87.8% B isocratic; 65–70 min, 87.8–0.0% B linear; followed by 5 min of re-equilibration. Procyanidins were detected using fluorescent detection (Excitation 231 nm, Emission 320 nm). Electrospray mass spectrometry was performed with a HCT mass spectrometer (Bruker Daltonics, Billerica, MA) in the negative ion mode. The experimental conditions for the mass spectrometer were as follows: nebulizer, 50 psi; dry gas, 10.0 L/min; dry temperature, 350 °C; smart parameter setting (SPS), compound stability, 50%; trap drive level, 110%; ion trap, scan from m/z 150 to 2000. The most abundant ions in full scan mass spectra were isolated and its product ion spectra were recorded.

### Supplementary Figure Legends

**Figure S1.** Chromatograms of procyanidins in cranberry phytochemical extract (A), ethyl acetate fraction (B), water fraction (C), water fraction I (D), II (E), and III (F) using fluorescence detection (excitation 231 nm and emission 320 nm). Identification was performed using HPLC-MS/MS ; B2 and B3 are B-type procyanidin dimers and trimers; A2,A3 and A4 are A-type procyanidin dimers, trimers and tetramers, respectively.

Figure S1

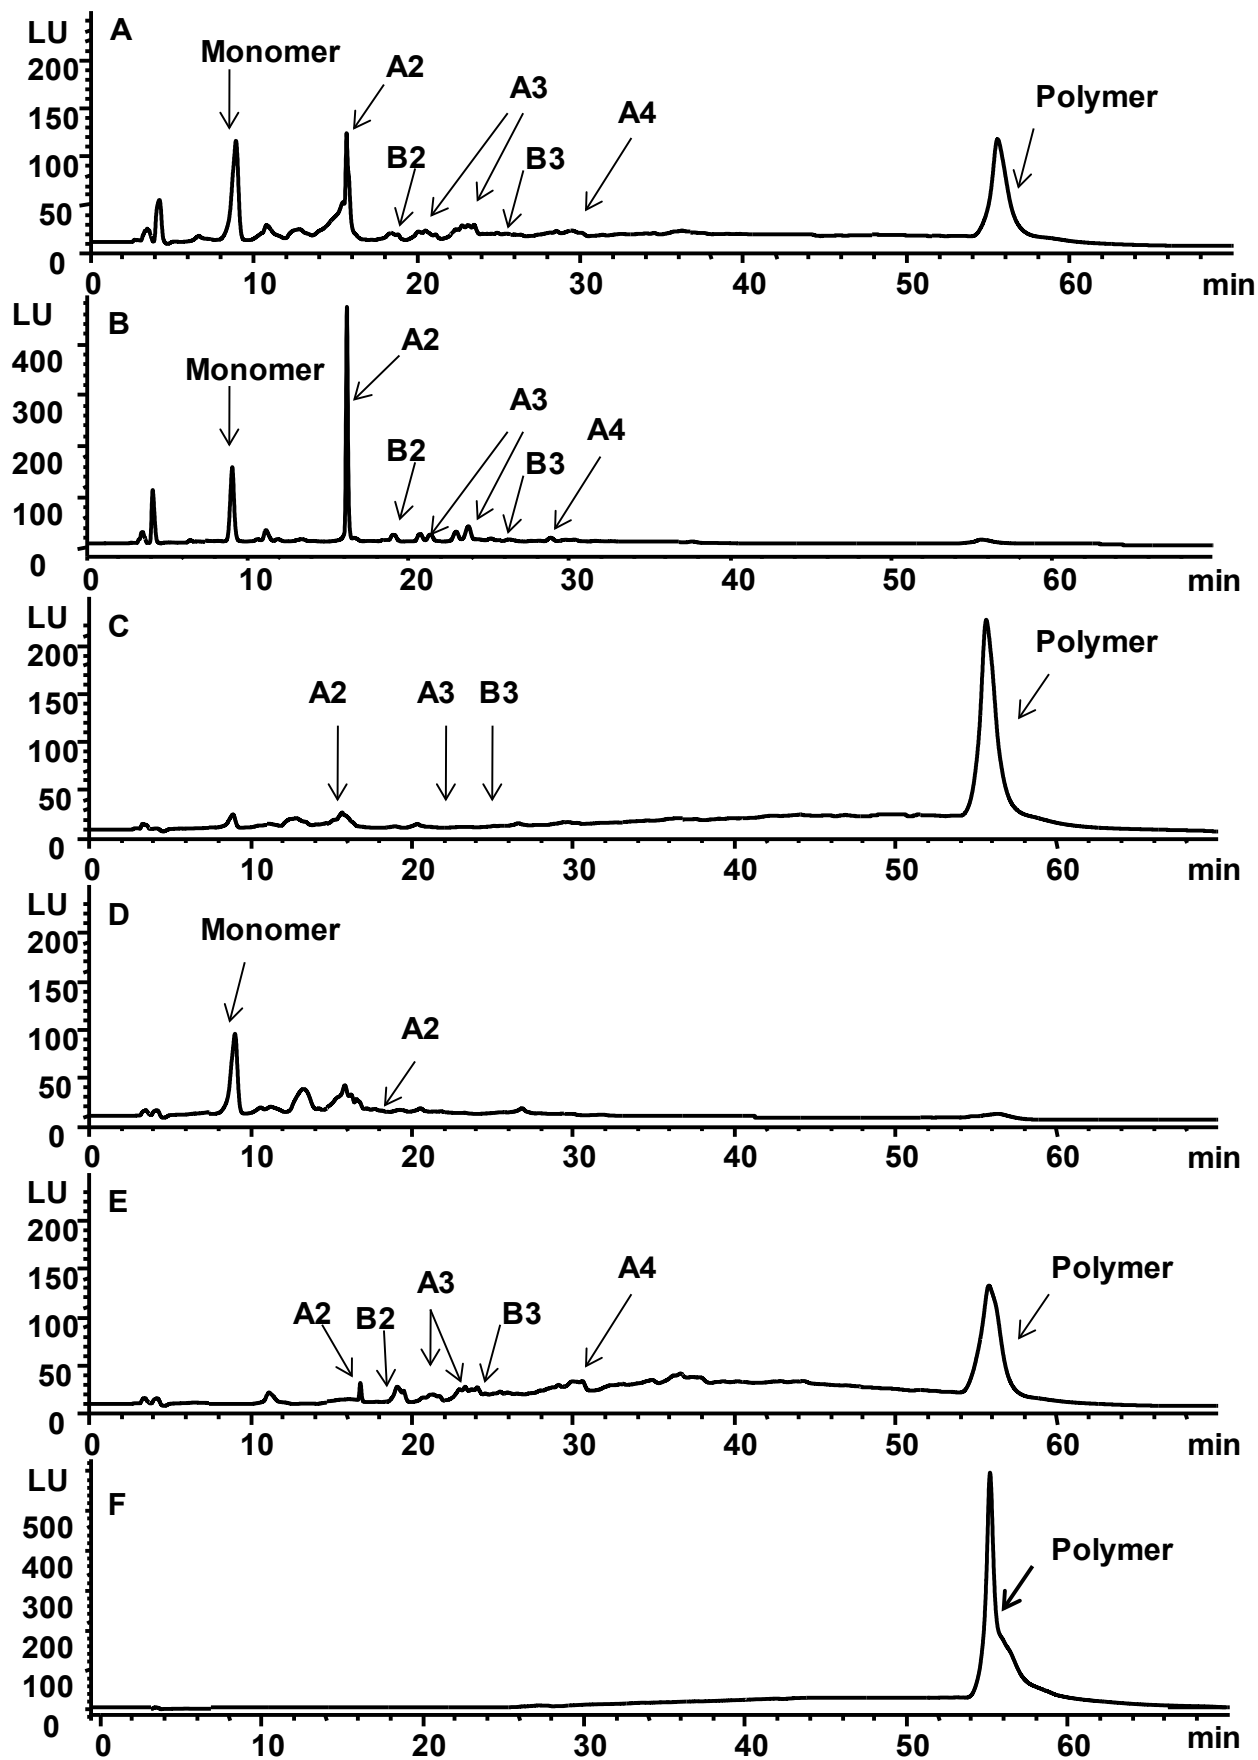

**Supplemental Table S1: Correlation coefficients (*r*) between phytochemical contents and antiglycation activities of cranberry extracts and fractions.**

|                                     | Total phenolic content | Total procyanidin content | Total anthocyanin content | HSA-MGO assay, EC <sub>50</sub> | HAS-Glucose assay, EC <sub>50</sub> | HbA1c levels |
|-------------------------------------|------------------------|---------------------------|---------------------------|---------------------------------|-------------------------------------|--------------|
| Total phenolic content              | 1.00                   | 0.97                      | -0.66                     | -0.71                           | -0.72                               | -0.47        |
| Total procyanidin content           |                        | 1.00                      | -0.68                     | -0.81                           | -0.84                               | -0.54        |
| Total anthocyanin content           |                        |                           | 1.00                      | 0.82                            | 0.75                                | 0.35         |
| HSA-MGO assay, EC <sub>50</sub>     |                        |                           |                           | 1.00                            | 0.99                                | 0.26         |
| HAS-Glucose assay, EC <sub>50</sub> |                        |                           |                           |                                 | 1.00                                | 0.31         |
| HbA1c levels (%)                    |                        |                           |                           |                                 |                                     | 1.00         |
